# Supplementary material for: Synthesis, Anticancer and Antibacterial Activity of Salinomycin N-Benzyl Amides
Source: PubMed Central journal article supplement (PMC6271077; doi:10.3390/molecules191219435), 2014-11-25
Supplement: molecules-19-19435-s001.pdf [file molecules-19-19435-s001.pdf]

## Supplementary Materials

**Figure S1.** The  $^{13}\text{C}$  NMR spectrum of **Br-*o*** in  $\text{CD}_2\text{Cl}_2$ .

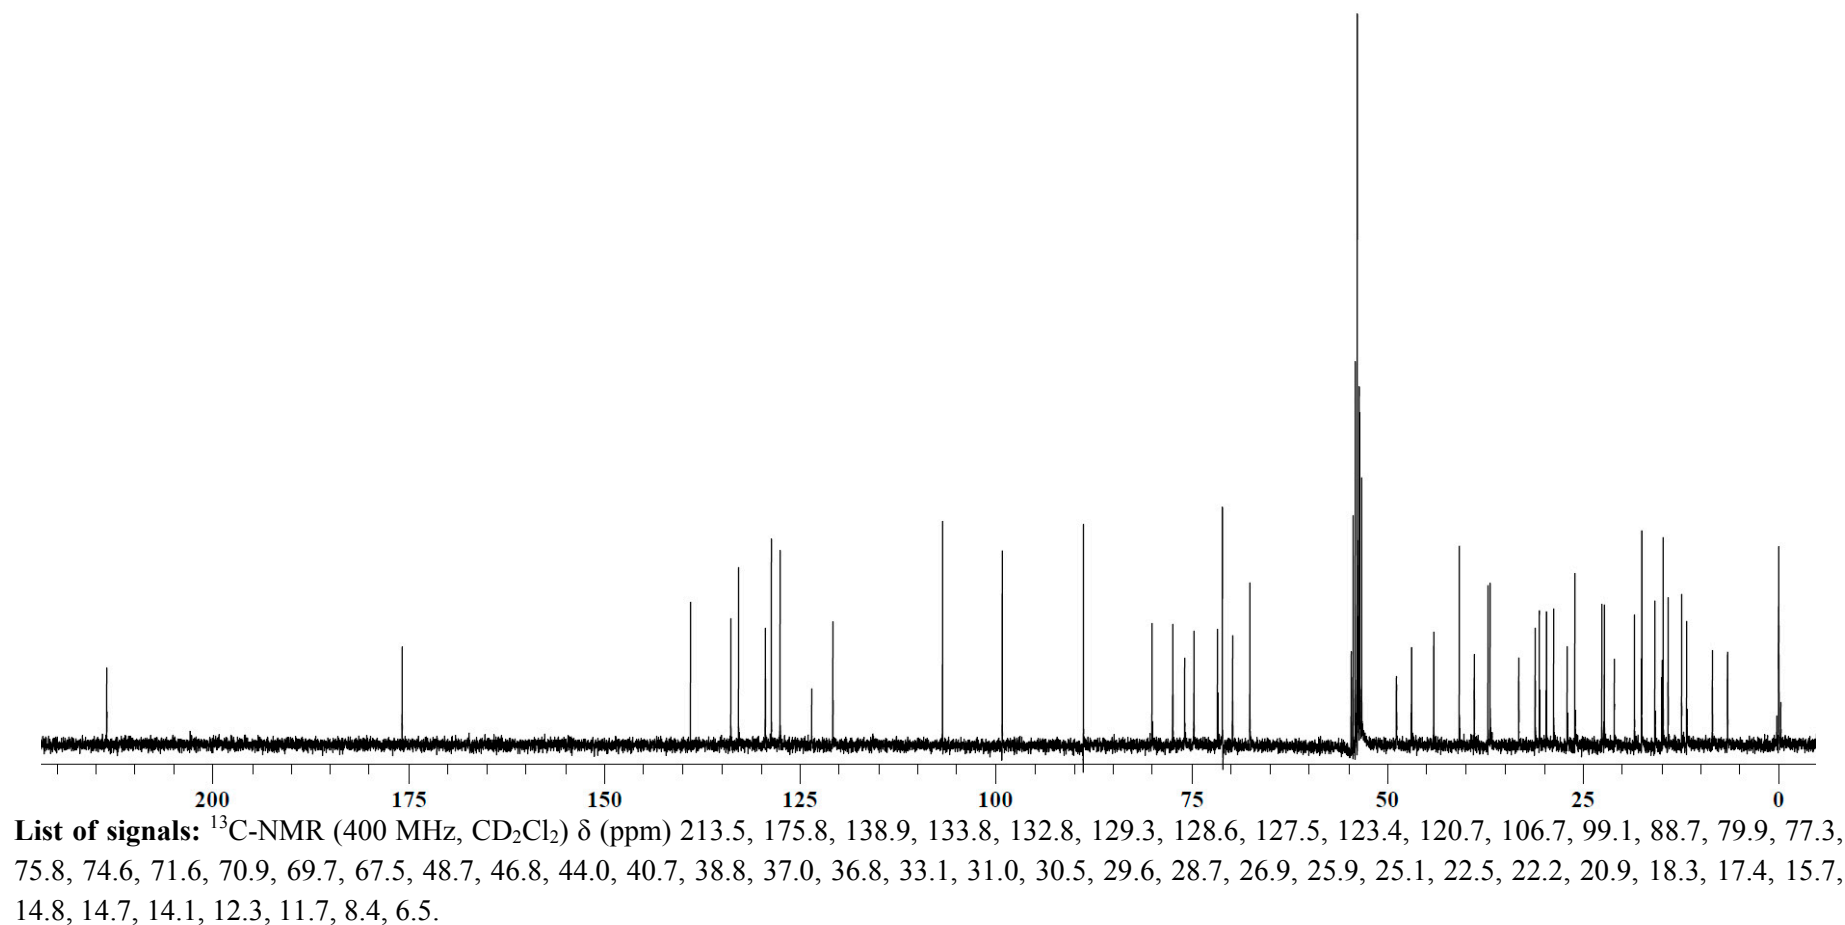

**Figure S2.** The  $^1\text{H}$  NMR spectrum of **Br-*o*** in  $\text{CD}_2\text{Cl}_2$ .

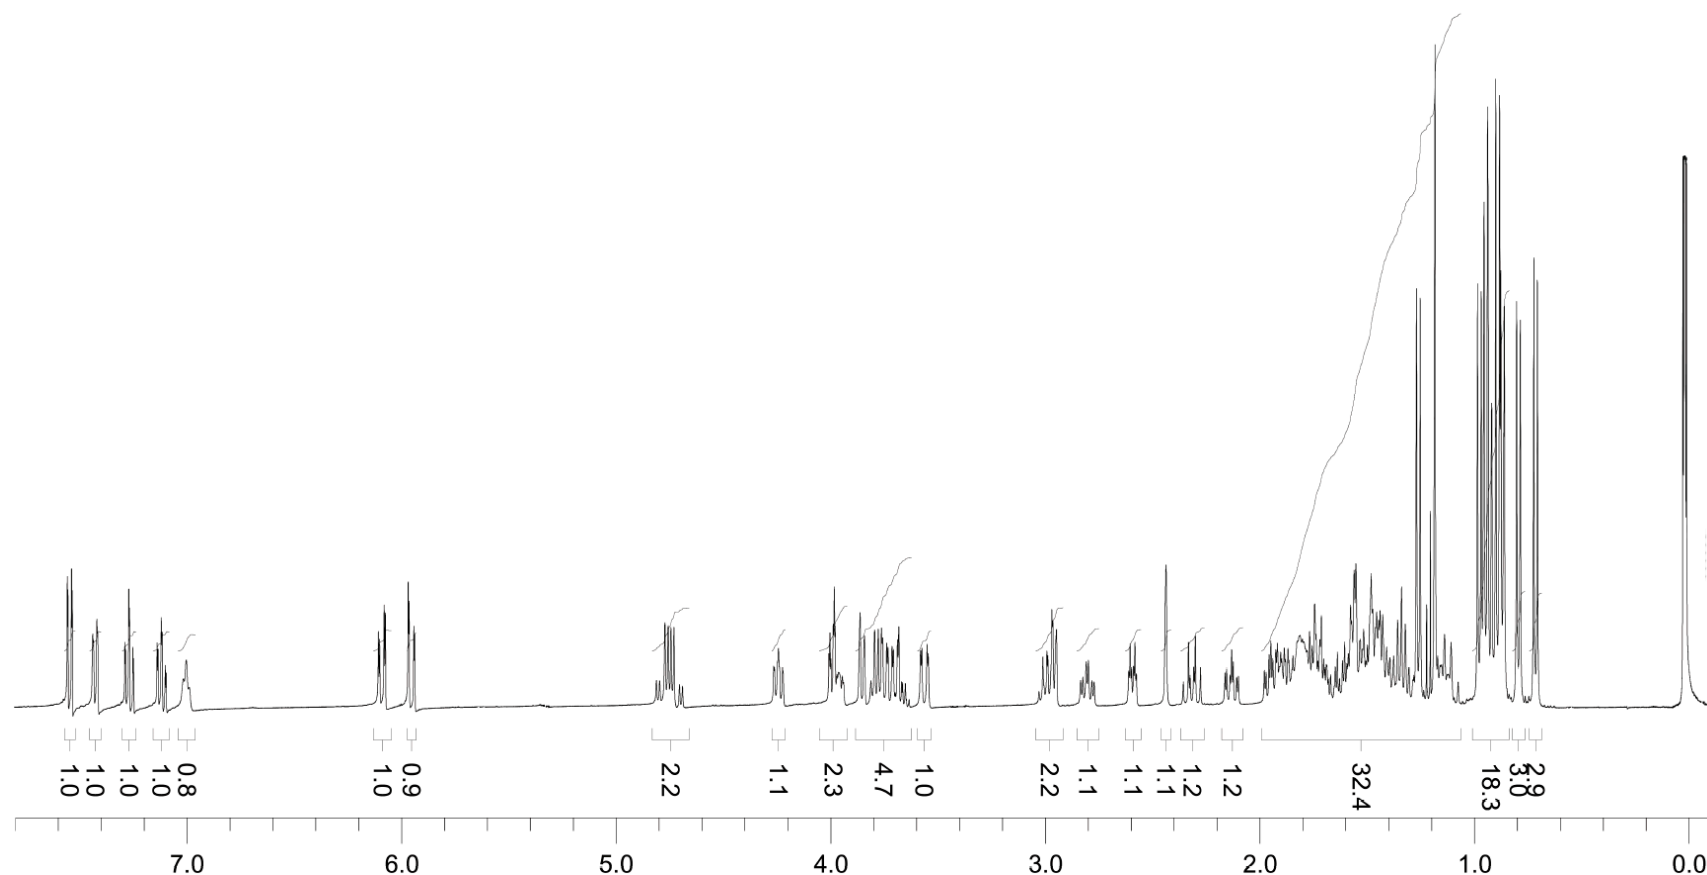

**List of signals:**  $^1\text{H}$ -NMR (400 MHz,  $\text{CD}_2\text{Cl}_2$ )  $\delta$  (ppm) 7.53 (dd,  $J = 7.93, 1.21$  Hz, 1H), 7.41 (dd,  $J = 7.69, 1.40$  Hz, 1H), 7.25 (dt,  $J = 7.53, 1.21$  Hz, 1H), 7.10 (dt,  $J = 7.64, 1.67$  Hz, 1H), 6.98 (t,  $J = 5.60$  Hz, 1H), 6.07 (dd,  $J = 10.74, 2.23$  Hz, 1H), 5.93 (dd,  $J = 10.69, 1.51$  Hz, 1H), 4.73 (dq,  $J = 16.20, 5.91$  Hz, 2H), 4.25-4.19 (m, 1H), 4.02-3.89 (m, 2H), 3.87-3.60 (m, 5H), 3.54 (dd,  $J = 12.14, 2.45$  Hz, 1H), 3.04-2.90 (m, 2H), 2.78 (dt,  $J = 10.79, 4.37$  Hz, 1H), 2.57 (td,  $J = 9.06, 2.63$  Hz, 1H), 2.42 (s, 1H), 2.30 (td,  $J = 12.61, 9.81$  Hz, 1H), 2.11 (ddd,  $J = 12.79, 9.76, 3.22$  Hz, 1H), 1.99-1.04 (m, 32H), 1.01-0.81 (m, 18H), 0.77 (d,  $J = 6.92$  Hz, 3H), 0.69 (d,  $J = 6.76$  Hz, 3H).

**Figure S3.** The  $^1\text{H}$ - $^{13}\text{C}$  HETCOR spectrum of **Br-*o*** in  $\text{CD}_2\text{Cl}_2$ .

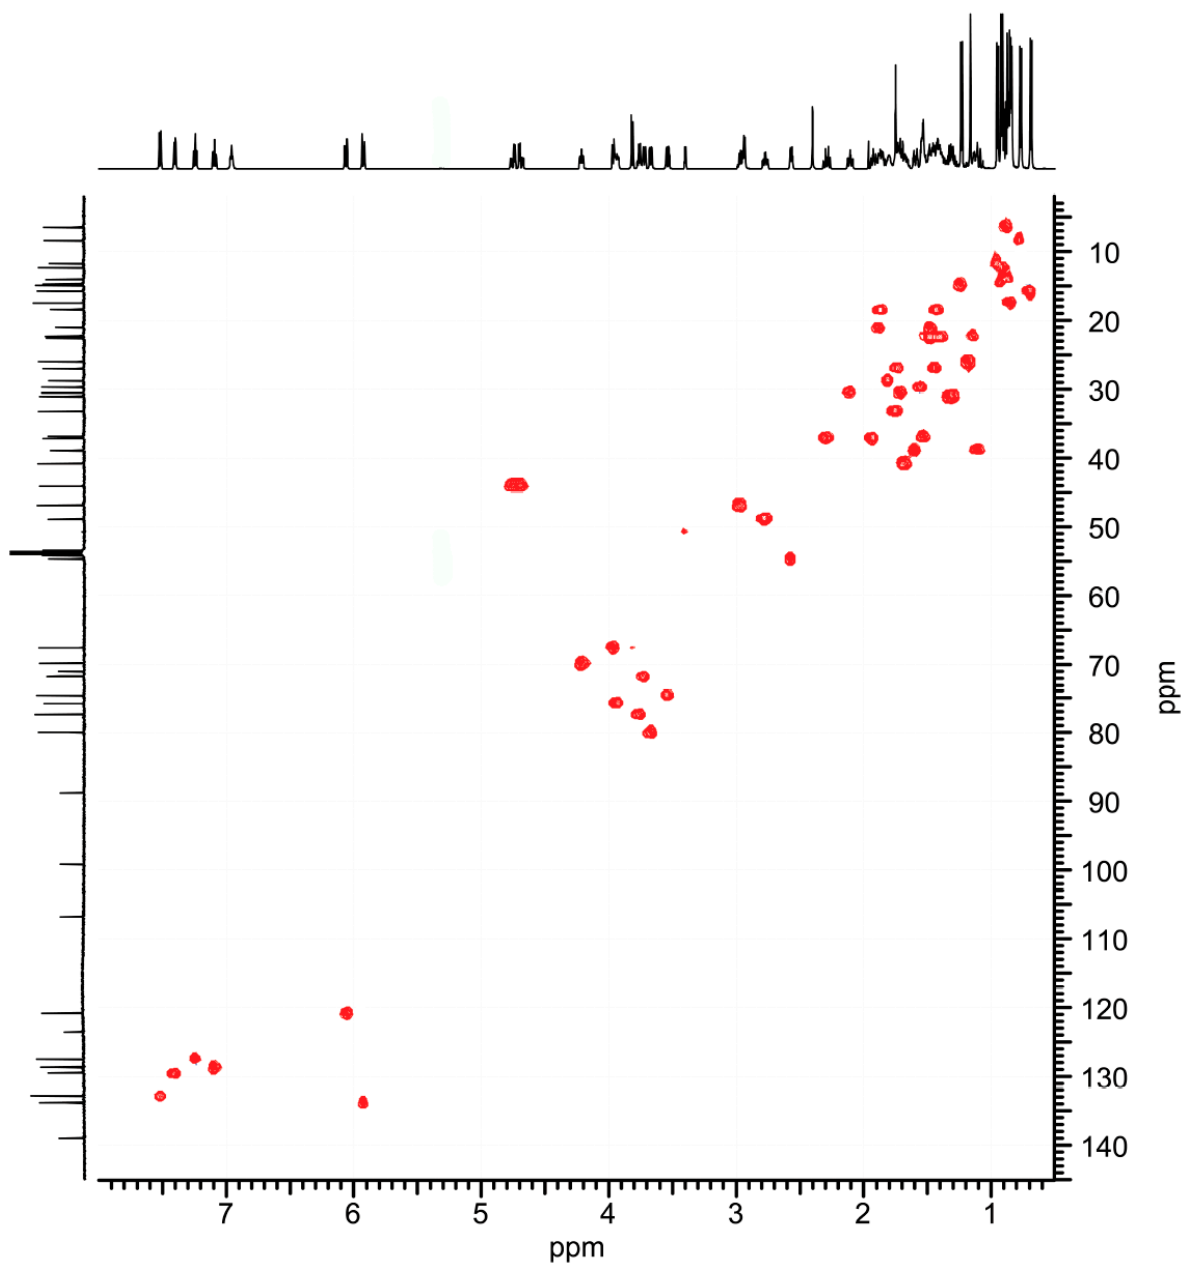

Figure S4. The  $^1\text{H}$ - $^1\text{H}$  COSY spectrum of **Br-*o*** in  $\text{CD}_2\text{Cl}_2$ .

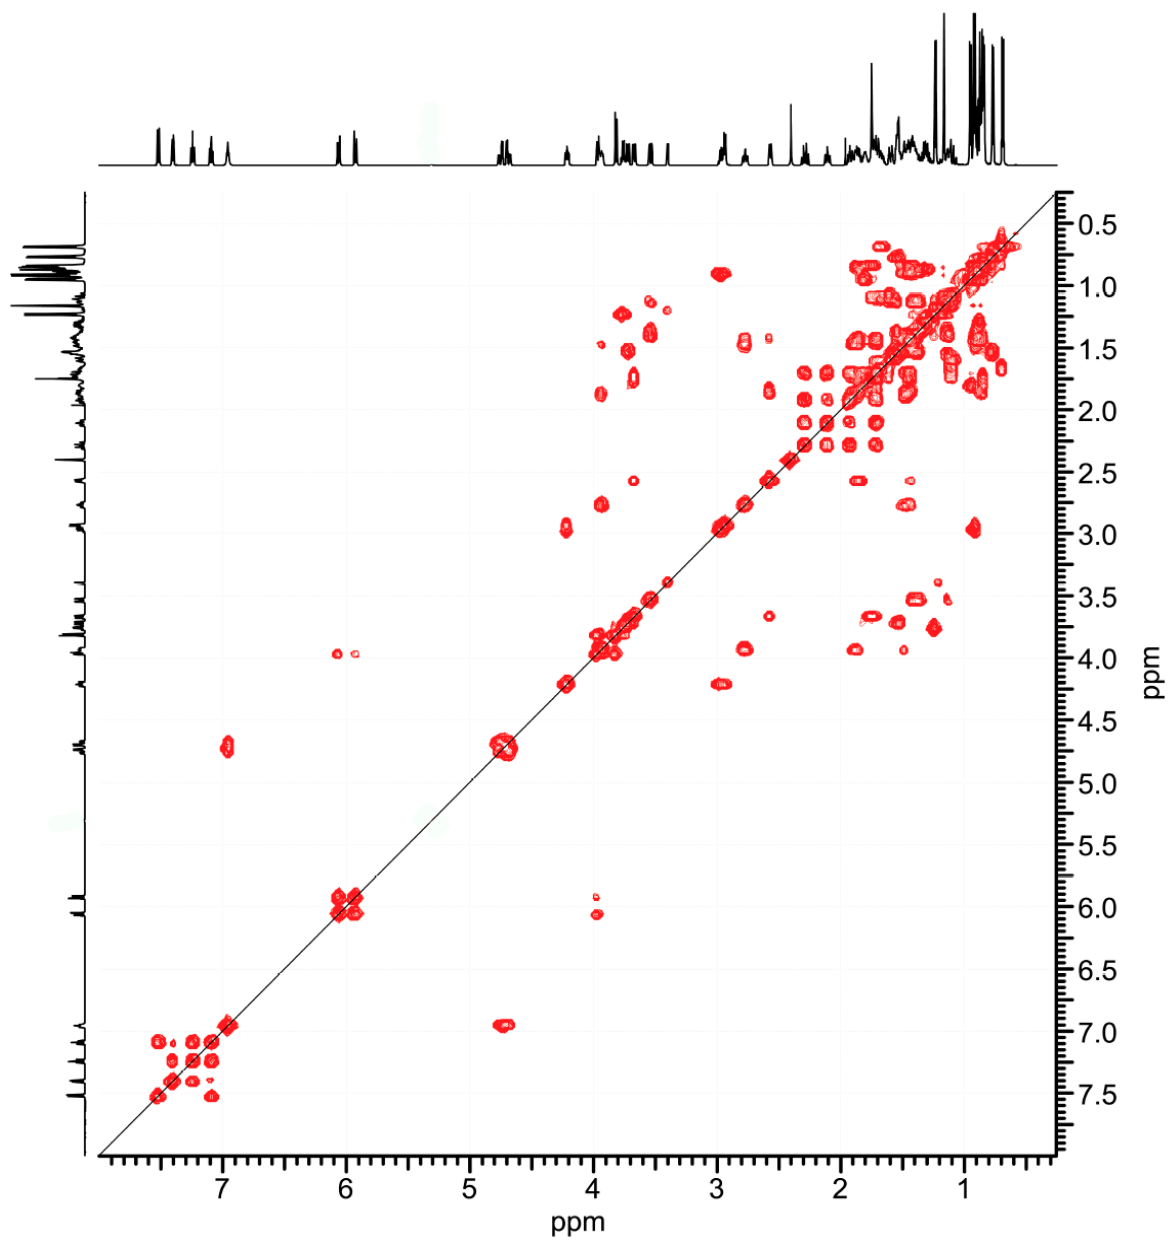

Figure S5. The  $^1\text{H}$ - $^{13}\text{C}$  HMBC spectrum of **Br-o** in  $\text{CD}_2\text{Cl}_2$ .

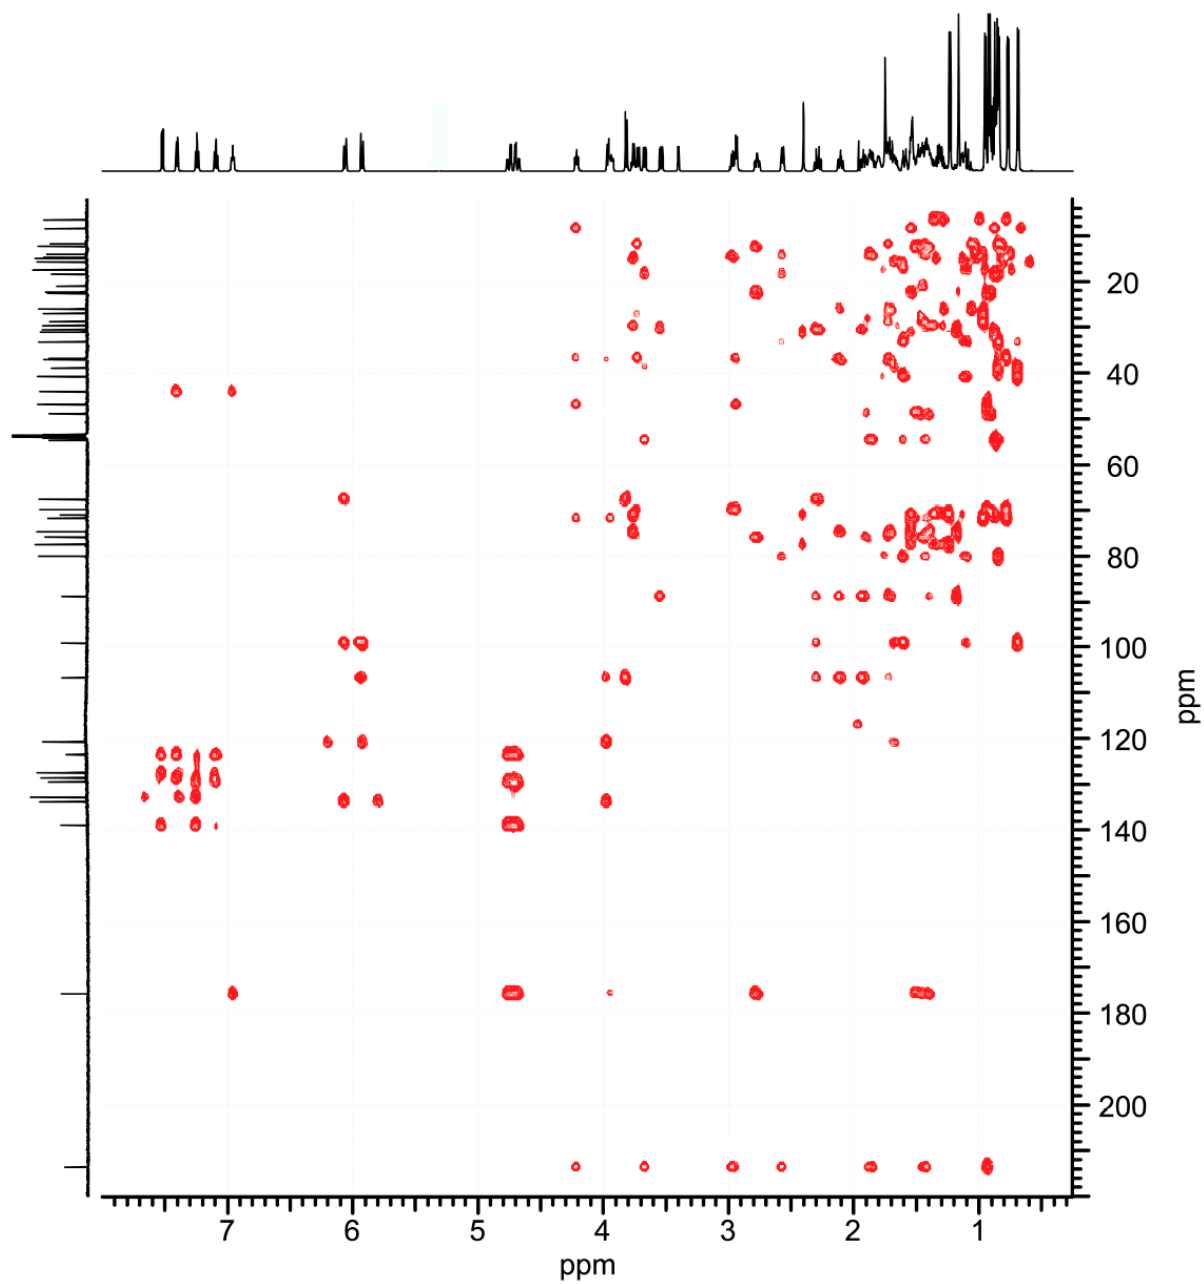

**Figure S6.** Arrangement of molecules in the crystals showing the intermolecular O-H $\cdots$ O hydrogen bonds between the hydroxyl group at C28 and carbonyl group C1=O: (a) **F-*o***, (b) **F-*m*** and (c) **NO<sub>2</sub>-*o***. The figures 6 and 7 are deleted because they are in manuscript. Thus Figures are re-numbered.

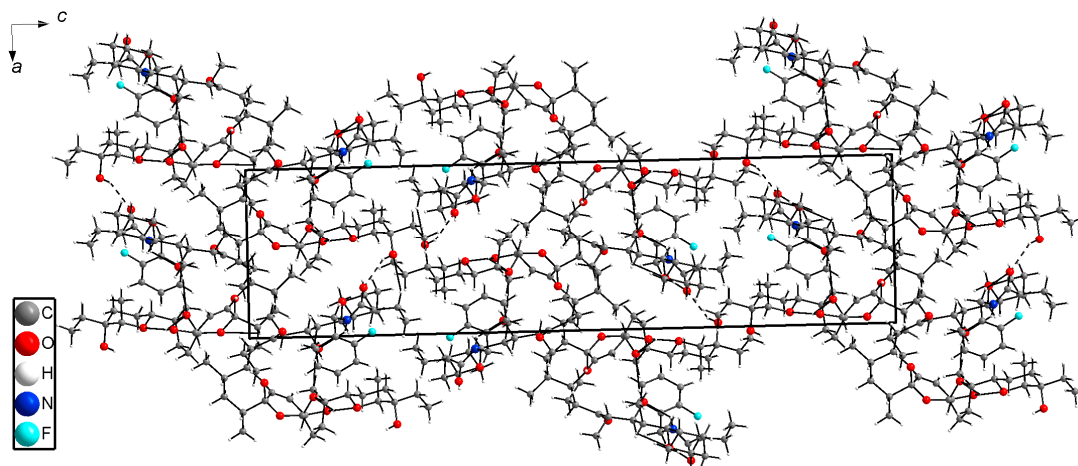

(a) **F-*o***

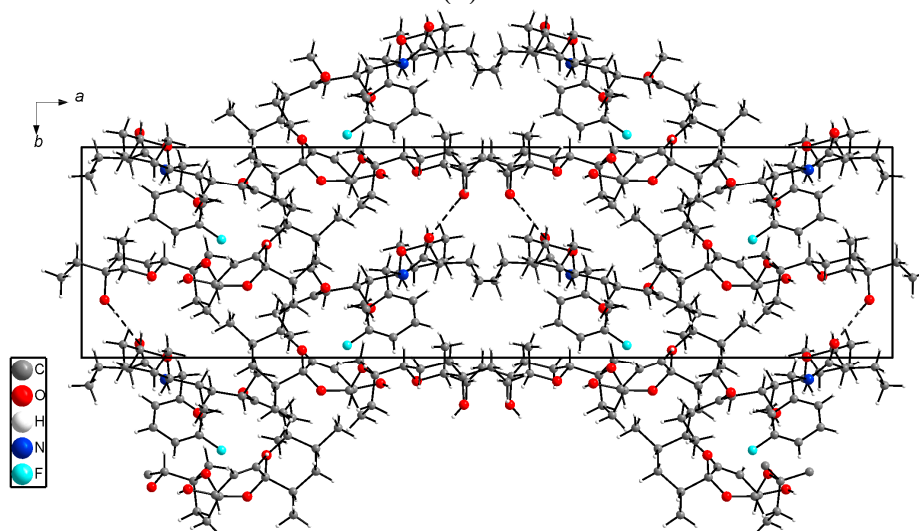

(b) **F-*m***

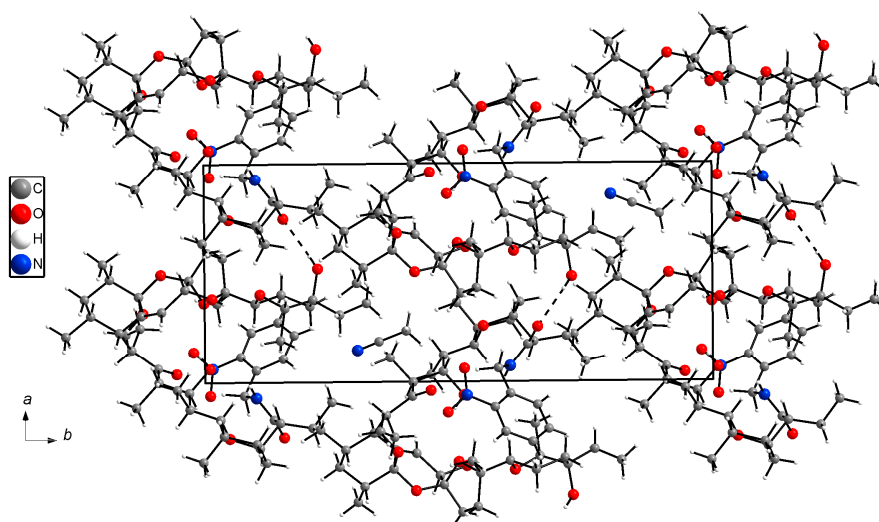

(c) **NO<sub>2</sub>-*o***

**Table S1.** Crystal data and structures refinements of SAL benzyl amides (**F-o**, **F-m** and **NO<sub>2</sub>-o**).

|                                                                             | <b>F-o</b>                                            | <b>F-m</b>                                        | <b>NO<sub>2</sub>-o</b>                                                                         |
|-----------------------------------------------------------------------------|-------------------------------------------------------|---------------------------------------------------|-------------------------------------------------------------------------------------------------|
| Formula                                                                     | C <sub>49</sub> H <sub>76</sub> FNO <sub>10</sub>     | C <sub>49</sub> H <sub>76</sub> FNO <sub>10</sub> | C <sub>49</sub> H <sub>76</sub> N <sub>2</sub> O <sub>12</sub> ·C <sub>2</sub> H <sub>3</sub> N |
| Formula weight                                                              | 858.11                                                | 858.11                                            | 926.17                                                                                          |
| Crystal system                                                              | orthorhombic                                          | monoclinic                                        | monoclinic                                                                                      |
| Space group                                                                 | <i>P</i> 2 <sub>1</sub> 2 <sub>1</sub> 2 <sub>1</sub> | <i>C</i> 2                                        | <i>P</i> 2 <sub>1</sub>                                                                         |
| <i>a</i> [Å]                                                                | 10.4157(7)                                            | 40.261(4)                                         | 10.4527(8)                                                                                      |
| <i>b</i> [Å]                                                                | 11.6486(9)                                            | 10.402(2)                                         | 23.149(2)                                                                                       |
| <i>c</i> [Å]                                                                | 39.663(3)                                             | 11.756(2)                                         | 11.2104(9)                                                                                      |
| β [°]                                                                       |                                                       | 96.10(1)                                          | 107.30(1)                                                                                       |
| <i>V</i> [Å <sup>3</sup> ]                                                  | 4812.2(6)                                             | 4895.5(13)                                        | 2589.9(4)                                                                                       |
| <i>Z</i>                                                                    | 4                                                     | 4                                                 | 2                                                                                               |
| <i>D</i> <sub>calc</sub> / <i>D</i> <sub>obs</sub> (g·cm <sup>-3</sup> )    | 1.184/1.18                                            | 1.164/1.16                                        | 1.188/1.185                                                                                     |
| μ (mm <sup>-1</sup> )                                                       | 0.084                                                 | 0.082                                             | 0.084                                                                                           |
| <i>F</i> (000)                                                              | 1864                                                  | 1864                                              | 1004                                                                                            |
| Crystal size (mm)                                                           | 0.33 × 0.28 × 0.22                                    | 0.35 × 0.28 × 0.23                                | 0.41 × 0.33 × 0.25                                                                              |
| MoK <sub>α</sub> λ [Å]                                                      | 0.71073                                               | 0.71073                                           | 0.71073                                                                                         |
| Temperature [K]                                                             | 295(2)                                                | 295(2)                                            | 295(2)                                                                                          |
| θ range [°]                                                                 | 2.62–28.41                                            | 2.53–28.39                                        | 3.25–28.16                                                                                      |
| <i>T</i> <sub>min</sub> / <i>T</i> <sub>max</sub>                           | 0.9766/0.9844                                         | 0.9766/0.9878                                     | 0.9733/0.9846                                                                                   |
| Refs collected/unique/observed                                              | 51949/11207/5623                                      | 26571/9924/5411                                   | 24987/11248/6413                                                                                |
| <i>R</i> <sub>int</sub>                                                     | 0.0398                                                | 0.0727                                            | 0.0245                                                                                          |
| <i>R</i> [ <i>F</i> <sub>2</sub> >2σ( <i>F</i> <sub>2</sub> )] <sup>a</sup> | 0.0772                                                | 0.0743                                            | 0.0552                                                                                          |
| w <i>R</i> ( <i>F</i> <sup>2</sup> all reflections) <sup>b</sup>            | 0.1014                                                | 0.1544                                            | 0.1281                                                                                          |
| <i>S</i>                                                                    | 1.002                                                 | 1.000                                             | 1.002                                                                                           |
| Flack parameter                                                             | −0.12 (6)                                             | −0.15(8)                                          | 0.18(9)                                                                                         |
| Δρ <sub>max</sub> , Δρ <sub>min</sub> (e Å <sup>-3</sup> )                  | +0.139, −0.130                                        | +0.390, −0.207                                    | + 0.314, −0.199                                                                                 |

<sup>a</sup>  $R = \sum ||F_o| - |F_c|| / \sum F_o$ ; <sup>b</sup>  $wR = \{ \sum [w(F_o^2 - F_c^2)^2] / \sum wF_o^4 \}^{1/2}$ ;  $w = 1 / [\sigma^2(F_o^2) + (aP)^2]$ , where  $P = (F_o^2 + 2F_c^2) / 3$  and  $a = 0.0250$ , for structure **F-o**;  $a = 0.0560$ , for structure **F-m** and  $a = 0.0320$  for structure **NO<sub>2</sub>-o**.

**Table S2.** Selected geometrical parameters (Å, °) of SAL benzyl amides **F-*o***, **F-*m*** and **NO<sub>2</sub>-*o***.

|                | <b>F-<i>o</i></b> | <b>F-<i>m</i></b> | <b>NO<sub>2</sub>-<i>o</i></b> |
|----------------|-------------------|-------------------|--------------------------------|
| <b>C1-O1</b>   | 1.219(2)          | 1.205(2)          | 1.240(2)                       |
| <b>C1-N1</b>   | 1.361(2)          | 1.350(2)          | 1.340(2)                       |
| <b>C1-C2</b>   | 1.509(2)          | 1.515(3)          | 1.500(2)                       |
| <b>C2-C3</b>   | 1.535(2)          | 1.531(3)          | 1.555(2)                       |
| <b>C2-C41</b>  | 1.542(2)          | 1.519(2)          | 1.519(2)                       |
| <b>C3-O2</b>   | 1.436(2)          | 1.440(2)          | 1.444(2)                       |
| <b>C3-C4</b>   | 1.518(2)          | 1.513(3)          | 1.500(2)                       |
| <b>O2-C7</b>   | 1.429(2)          | 1.407(2)          | 1.443(2)                       |
| <b>C4-C5</b>   | 1.478(2)          | 1.458(3)          | 1.486(3)                       |
| <b>C5-C6</b>   | 1.533(2)          | 1.555(3)          | 1.548(3)                       |
| <b>C6-C7</b>   | 1.519(2)          | 1.542(2)          | 1.524(2)                       |
| <b>C6-C40</b>  | 1.539(2)          | 1.516(3)          | 1.524(3)                       |
| <b>C7-C8</b>   | 1.527(2)          | 1.519(2)          | 1.521(2)                       |
| <b>C8-C39</b>  | 1.516(2)          | 1.521(2)          | 1.544(2)                       |
| <b>C8-C9</b>   | 1.545(2)          | 1.550(2)          | 1.534(2)                       |
| <b>C9-O3</b>   | 1.434(2)          | 1.425(2)          | 1.431(2)                       |
| <b>C9-C10</b>  | 1.530(2)          | 1.531(2)          | 1.526(2)                       |
| <b>C10-C11</b> | 1.519(2)          | 1.534(2)          | 1.517(2)                       |
| <b>C10-C38</b> | 1.537(2)          | 1.529(2)          | 1.531(2)                       |
| <b>C11-O4</b>  | 1.199(2)          | 1.204(2)          | 1.204(2)                       |
| <b>C11-C12</b> | 1.543(2)          | 1.528(2)          | 1.533(2)                       |
| <b>C12-C36</b> | 1.518(2)          | 1.535(2)          | 1.544(3)                       |
| <b>C12-C13</b> | 1.543(2)          | 1.537(2)          | 1.537(2)                       |
| <b>C13-O5</b>  | 1.438(2)          | 1.434(2)          | 1.438(2)                       |
| <b>C13-C14</b> | 1.532(2)          | 1.535(2)          | 1.537(2)                       |
| <b>O5-C17</b>  | 1.455(2)          | 1.438(2)          | 1.438(2)                       |
| <b>C14-C35</b> | 1.520(2)          | 1.525(2)          | 1.514(2)                       |
| <b>C14-C15</b> | 1.521(2)          | 1.517(2)          | 1.514(2)                       |
| <b>C15-C16</b> | 1.526(2)          | 1.523(2)          | 1.525(2)                       |
| <b>C16-C34</b> | 1.522(2)          | 1.504(2)          | 1.491(2)                       |
| <b>C16-C17</b> | 1.540(2)          | 1.537(2)          | 1.542(2)                       |
| <b>C17-O6</b>  | 1.416(2)          | 1.411(2)          | 1.417(2)                       |
| <b>C17-C18</b> | 1.476(2)          | 1.499(2)          | 1.508(2)                       |
| <b>O6-C21</b>  | 1.428(2)          | 1.423(2)          | 1.428(2)                       |
| <b>C18-C19</b> | 1.317(2)          | 1.296(2)          | 1.298(2)                       |
| <b>C19-C20</b> | 1.492(2)          | 1.484(2)          | 1.479(2)                       |
| <b>C20-O7</b>  | 1.420(2)          | 1.417(2)          | 1.416(2)                       |
| <b>C20-C21</b> | 1.513(2)          | 1.534(2)          | 1.522(2)                       |
| <b>C21-O8</b>  | 1.421(2)          | 1.407(2)          | 1.413(2)                       |
| <b>C21-C22</b> | 1.519(2)          | 1.505(2)          | 1.522(2)                       |
| <b>O8-C24</b>  | 1.448(2)          | 1.478(2)          | 1.463(2)                       |
| <b>C22-C23</b> | 1.489(2)          | 1.515(3)          | 1.509(2)                       |



**Table S2. Cont.**

|                    | <b>F-o</b> | <b>F-m</b> | <b>NO<sub>2</sub>-o</b> |
|--------------------|------------|------------|-------------------------|
| <b>C23-C24</b>     | 1.550(2)   | 1.505(2)   | 1.540(2)                |
| <b>C24-C25</b>     | 1.506(2)   | 1.509(2)   | 1.536(2)                |
| <b>C24-C33</b>     | 1.519(2)   | 1.496(2)   | 1.500(2)                |
| <b>C25-O9</b>      | 1.422(2)   | 1.439(2)   | 1.426(2)                |
| <b>C25-C26</b>     | 1.514(2)   | 1.513(2)   | 1.501(2)                |
| <b>O9-C29</b>      | 1.435(2)   | 1.431(2)   | 1.441(2)                |
| <b>C26-C27</b>     | 1.521(2)   | 1.509(3)   | 1.548(3)                |
| <b>C27-C28</b>     | 1.519(2)   | 1.507(3)   | 1.537(4)                |
| <b>C28-O10</b>     | 1.432(2)   | 1.428(2)   | 1.429(2)                |
| <b>C28-C29</b>     | 1.519(2)   | 1.544(3)   | 1.496(3)                |
| <b>C28-C31</b>     | 1.532(2)   | 1.530(3)   | 1.542(3)                |
| <b>C29-C30</b>     | 1.540(2)   | 1.523(3)   | 1.505(2)                |
| <b>C31-C32</b>     | 1.508(3)   | 1.473(3)   | 1.339(4)                |
| <b>C36-C37</b>     | 1.509(2)   | 1.475(3)   | 1.403(4)                |
| <b>C41-C42</b>     | 1.500(2)   | 1.460(4)   | 1.516(3)                |
| <b>N1-C43</b>      | 1.443(2)   | 1.445(2)   | 1.442(2)                |
| <b>O1-C1-N1</b>    | 120.29(15) | 122.00(18) | 120.65(13)              |
| <b>O1-C1-C2</b>    | 123.15(14) | 120.78(17) | 121.18(12)              |
| <b>N1-C1-C2</b>    | 116.53(13) | 117.16(16) | 118.14(13)              |
| <b>C1-C2-C3</b>    | 107.39(12) | 106.60(14) | 105.47(12)              |
| <b>O2-C3-C4</b>    | 110.88(13) | 109.98(17) | 110.63(12)              |
| <b>O2-C3-C2</b>    | 109.07(11) | 110.15(14) | 109.58(10)              |
| <b>C2-C3-C4</b>    | 118.12(12) | 118.81(16) | 118.92(13)              |
| <b>C7-O2-C3</b>    | 114.39(10) | 115.52(12) | 115.15(11)              |
| <b>C3-C4-C5</b>    | 111.62(13) | 112.41(18) | 112.16(13)              |
| <b>C4-C5-C6</b>    | 110.62(13) | 110.79(18) | 110.84(16)              |
| <b>C5-C6-C7</b>    | 107.85(13) | 106.87(17) | 106.59(14)              |
| <b>O2-C7-C6</b>    | 110.64(10) | 109.64(14) | 109.24(11)              |
| <b>O2-C7-C8</b>    | 106.05(10) | 107.09(12) | 106.55(11)              |
| <b>C6-C7-C8</b>    | 116.50(12) | 116.09(15) | 116.56(13)              |
| <b>C7-C8-C9</b>    | 110.34(11) | 110.74(13) | 111.38(12)              |
| <b>C8-C9-C10</b>   | 113.26(10) | 113.08(12) | 114.12(12)              |
| <b>O3-C9-C8</b>    | 110.60(10) | 109.99(11) | 111.09(11)              |
| <b>O3-C9-C10</b>   | 110.35(10) | 111.22(11) | 110.87(9)               |
| <b>C9-C10-C11</b>  | 113.28(11) | 112.29(12) | 113.96(12)              |
| <b>C10-C11-C12</b> | 118.40(11) | 117.48(12) | 119.31(13)              |
| <b>O4-C11-C10</b>  | 121.33(12) | 121.28(13) | 120.38(12)              |
| <b>O4-C11-C12</b>  | 119.94(12) | 120.93(13) | 119.97(12)              |
| <b>C11-C12-C13</b> | 112.78(10) | 117.48(12) | 119.31(13)              |
| <b>C12-C13-C14</b> | 115.35(11) | 115.53(12) | 116.43(12)              |
| <b>O5-C13-C12</b>  | 106.21(10) | 106.71(12) | 104.25(12)              |
| <b>O5-C13-C14</b>  | 112.81(10) | 112.41(12) | 112.02(11)              |
| <b>C13-O5-C17</b>  | 115.03(9)  | 115.60(11) | 115.89(10)              |
| <b>C13-C14-C15</b> | 107.49(11) | 107.08(12) | 106.01(12)              |
| <b>C14-C15-C16</b> | 111.96(11) | 112.99(13) | 114.33(13)              |

**Table S2. Cont.**

|                    | <b>F-o</b> | <b>F-m</b>  | <b>NO<sub>2</sub>-o</b> |
|--------------------|------------|-------------|-------------------------|
| <b>C15-C16-C17</b> | 111.07(10) | 110.94(12)  | 110.86(11)              |
| <b>O6-C17-O5</b>   | 105.13(10) | 106.30(11)  | 104.54(10)              |
| <b>O6-C17-C18</b>  | 112.50(11) | 111.61(12)  | 111.77(11)              |
| <b>O5-C17-C18</b>  | 110.80(10) | 110.53(12)  | 110.90(10)              |
| <b>O6-C17-C16</b>  | 104.88(9)  | 105.26(11)  | 104.78(9)               |
| <b>O5-C17-C16</b>  | 108.75(10) | 109.82(11)  | 110.67(11)              |
| <b>C16-C17-C18</b> | 114.23(11) | 113.00(13)  | 113.65(11)              |
| <b>C17-O6-C21</b>  | 120.87(10) | 121.91(11)  | 119.87(8)               |
| <b>C17-C18-C19</b> | 124.05(13) | 123.41(15)  | 122.43(13)              |
| <b>C18-C19-C20</b> | 121.52(14) | 123.44(15)  | 123.54(12)              |
| <b>O7-C20-C19</b>  | 110.94(12) | 111.66(15)  | 112.46 (11)             |
| <b>O7-C20-C21</b>  | 112.48(12) | 111.63(13)  | 111.60(12)              |
| <b>C19-C20-C21</b> | 111.04(12) | 110.28(14)  | 110.24(12)              |
| <b>O8-C21-O6</b>   | 111.32(10) | 111.78(12)  | 112.23(11)              |
| <b>O8-C21-C20</b>  | 108.71(11) | 107.93(13)  | 108.17(10)              |
| <b>O6-C21-C20</b>  | 110.98(11) | 110.51(13)  | 109.55(11)              |
| <b>O8-C21-C22</b>  | 104.01(11) | 106.15(13)  | 105.46(11)              |
| <b>O6-C21-C22</b>  | 107.43(11) | 107.05(13)  | 105.88(10)              |
| <b>C20-C21-C22</b> | 114.22(12) | 113.39 (14) | 115.57(12)              |
| <b>C21-C22-C23</b> | 106.89(11) | 104.24 (14) | 104.79(12)              |
| <b>C21-O8-C24</b>  | 112.89(10) | 111.14 (11) | 112.14(9)               |
| <b>C22-C23-C24</b> | 104.29(12) | 106.49 (15) | 104.25(11)              |
| <b>C23-C24-C25</b> | 114.03(11) | 114.18 (14) | 114.22(12)              |
| <b>O8-C24-C25</b>  | 106.86(11) | 105.66 (12) | 105.59(10)              |
| <b>C24-C25-C26</b> | 116.36(12) | 115.46 (14) | 115.84(13)              |
| <b>O9-C25-C26</b>  | 110.23(11) | 109.98 (14) | 108.58(14)              |
| <b>C25-O9-C29</b>  | 114.66(10) | 115.06 (13) | 114.76(12)              |
| <b>C25-C26-C27</b> | 110.49(13) | 111.06 (15) | 110.74(17)              |
| <b>C26-C27-C28</b> | 111.79(13) | 113.81 (16) | 113.40(18)              |
| <b>C27-C28-C29</b> | 110.15(12) | 108.81 (15) | 109.25(17)              |
| <b>O10-C28-C27</b> | 109.13(13) | 110.05 (16) | 110.90(17)              |
| <b>C28-C29-C30</b> | 114.92(12) | 115.32 (16) | 115.77(16)              |
| <b>O9-C29-C28</b>  | 111.03(13) | 111.46 (16) | 112.58(14)              |
